# Supplementary material for: Glycerine-based synthesis of a highly efficient Fe2O3 electrocatalyst for N2 fixation
Source: Royal Society of Chemistry journal article supplement (doi:10.1039/d0ra05831a), 2020-01-01
Supplement: d0ra05831a1.pdf [file d0ra05831a1.pdf]

## Electronic Supplementary Information

### Glycerine-based synthesis of highly efficient Fe<sub>2</sub>O<sub>3</sub> electrocatalyst for N<sub>2</sub> fixation

Meng Wang, Feifei Li,\* Juan Liu

Kangda College of Nanjing Medical University, Lianyungang, 222000, China, E-mail address:

ffl@foxmail.com

**Table S1** Comparison of NRR performance for the different catalysts at room temperature and ambient pressure.

| Catalyst                                      | Electrolyte                               | Potential<br>(V vs. RHE) | NH <sub>3</sub> formation rate                                        | FE (%)     | Ref.                |
|-----------------------------------------------|-------------------------------------------|--------------------------|-----------------------------------------------------------------------|------------|---------------------|
| Rh                                            | 0.1 M KOH                                 | -0.2                     | 35.58 $\mu\text{g mg}_{\text{cat}}^{-1} \text{h}^{-1}$                | 0.52       | 1                   |
| Fe <sub>3</sub> O <sub>4</sub> /Ti            | 0.1 M Na <sub>2</sub> SO <sub>4</sub>     | -0.4                     | $5.6 \times 10^{-11} \text{ mol s}^{-1} \text{ cm}^{-2}$              | 2.6        | 2                   |
| MoS <sub>2</sub> /CC                          | 0.1 M Na <sub>2</sub> SO <sub>4</sub>     | -0.5                     | $8.08 \times 10^{-11} \text{ mol s}^{-1} \text{ cm}^{-2}$             | 1.17       | 3                   |
| MoO <sub>3</sub>                              | 0.1 M HCl                                 | -0.4                     | 29.43 $\mu\text{g mg}_{\text{cat}}^{-1} \text{h}^{-1}$                | 1.9        | 4                   |
| Ti <sub>3</sub> C <sub>2</sub> T <sub>x</sub> | 0.5 M Li <sub>2</sub> SO <sub>4</sub>     | -0.2                     | 0.26 $\mu\text{g mg}_{\text{cat}}^{-1} \text{h}^{-1}$                 | 5.78       | 5                   |
| Fe <sub>2</sub> O <sub>3</sub>                | 0.1 M Na <sub>2</sub> SO <sub>4</sub>     | -0.8                     | 15.9 $\mu\text{g mg}_{\text{cat}}^{-1} \text{h}^{-1}$                 | 0.94       | 6                   |
| <b>Fe<sub>2</sub>O<sub>3</sub></b>            | <b>0.1 M Na<sub>2</sub>SO<sub>4</sub></b> | <b>-0.5</b>              | <b>22 <math>\mu\text{g mg}_{\text{cat}}^{-1} \text{h}^{-1}</math></b> | <b>3.5</b> | <b>Our<br/>work</b> |

CC = Carbon cloth

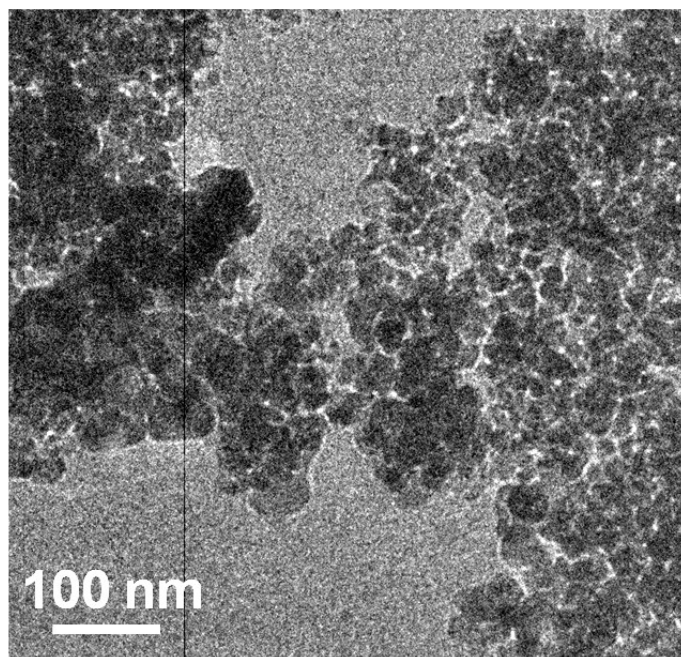

**Fig. S1** TEM image of the synthesized Fe<sub>2</sub>O<sub>3</sub> after long-term test.

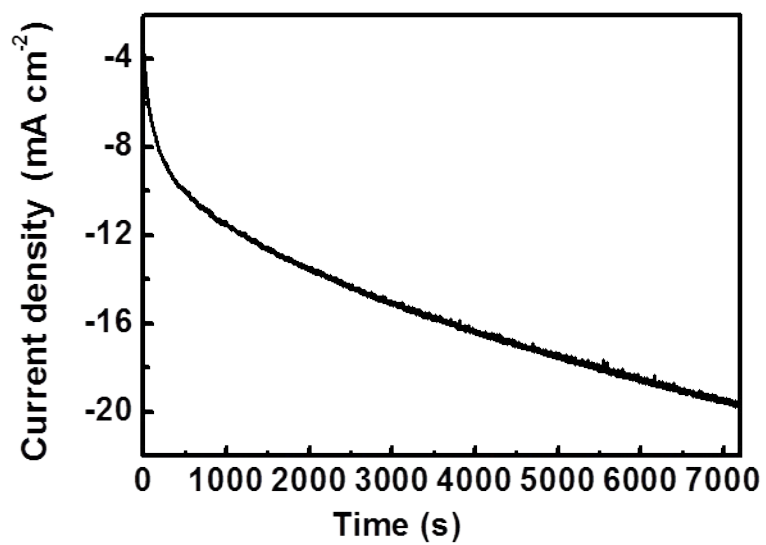

**Fig. S2** The time-dependent current density curve for Fe<sub>2</sub>O<sub>3</sub> at -0.5 V in 0.1 M KOH.

## References

- 1 T. Chen, S. Liu, H. Ying, Z. Li, and J. Hao, *Chem. Asian J.*, 2020, **15**, 1081-1087.
- 2 Q. Liu, X. Zhang, Z. Bing, Y. Luo, G. Cui, F. Xie and X. Sun, *Nanoscale*, 2018, **10**, 14386-14389.
- 3 L. Zhang, X. Ji, X. Ren, Y. Ma, X. Shi, Z. Tian, A. M. Asiri, L. Chen, B. Tang and X. Sun, *Adv. Mater.*, 2018, **30**, 1800191.
- 4 J. Han, X. Ji, X. Ren, G. Cui, L. Li, F. Xie, H. Wang, Baihai Li and Xuping Sun, *J. Mater. Chem. A*, 2018, **6**, 12974.
- 5 Y. Luo, G. Chen, L. Ding, X. Chen, L. Ding and H. Wang, *Joule*, 2019, **3**, 1-11.
- 6 X. Xiang, Z. Wang, X. Shi, M. Fan and X. Sun, *ChemCat tChem*, 2018, **10**, 4530-4535.
